1 Article

# 2 Evolution of bacterial persistence to antibiotics during a 50,000- 3 generation experiment in an antibiotic-free environment.

4 Hugo Mathé-Hubert<sup>1</sup>, Rafika Amia<sup>1</sup>, Mikaël Martin<sup>1</sup>, Joël Gaffé<sup>1</sup>, Dominique Schneider<sup>1</sup>

5  
6 <sup>1</sup> Univ. Grenoble Alpes, CNRS, Grenoble INP, TIMC, Grenoble, France.

7 \* Correspondence: [hugomh@gmx.fr](mailto:hugomh@gmx.fr)

## 8 Abstract:

9 Failure of antibiotic therapies causes > 700,000 deaths yearly and involves both bacterial resistance  
10 and persistence. Persistence results in the relapse of infections by producing a tiny fraction of patho-  
11 gen survivors that stay dormant during antibiotic exposure. From an evolutionary perspective,  
12 persistence is either a 'bet-hedging strategy' that helps to cope with stochastically changing envi-  
13 ronments or an unavoidable minimal rate of 'cellular errors' that lock the cells in a low activity state.  
14 Here, we analyzed the evolution of persistence over 50,000 bacterial generations in a stable environ-  
15 ment by improving a published method that estimates the number of persister cells based on the  
16 growth of the reviving population. Our results challenged our understanding of the factors under-  
17 lying persistence evolution. In one case, we observed a substantial decrease in persistence propor-  
18 tion, suggesting that the naturally observed persistence level is not an unavoidable minimal rate of  
19 'cellular errors'. However, although there was no obvious environmental stochasticity, in most cases  
20 the persistence level was maintained during 50,000 bacterial generations, and even increased in few  
21 cases.

22 **Citation:** Lastname, F.; Lastname, F.;  
23 Last-name, F. Title. *Antibiotics* 2021,  
24 10, x. <https://doi.org/10.3390/xxxxx>

**Keywords:** antibiotic persistence, evolution, *Escherichia coli*, beta-lactam, ampicillin, fluoroquinolones, ciprofloxacin, Start-Growth-Time, bacterial quantification.

Received: date

Accepted: date

Published: date

## 25 1. Introduction

26  
27 **Publisher's Note:** MDPI stays neu-  
28 tral with regard to jurisdictional  
29 claims in published maps and insti-  
30 tutional affiliations.

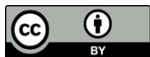

31  
32 **Copyright:** © 2020 by the authors.  
33 Submitted for possible open access  
34 publication under the terms and  
35 conditions of the Creative Common  
36 Attribution (CC BY) license  
37 (<http://creativecommons.org/licenses/by/4.0/>).  
38  
39

The current evolution of bacterial resistance to antibiotics brings humanity back to a situation reminiscent of the 'pre-antibiotic era' [1,2], mostly owing to the impressive bacterial adaptive properties. This alarming situation results in the death of more than 700,000 people every year. A worst-case scenario anticipates that this number might rise up to 10 million deaths per year by 2050, about three times the COVID-19 death rate [2]. In Europe in 2015, this caused ~ 30,000 deaths per year, twice that in 2007 [3].

To cope with high antibiotic concentrations, bacteria rely on various processes that lead to different population dynamics [4–6]. These differences can be used to tentatively classify them. I) Resistance allows bacteria to grow under such antibiotic stress. II) Tolerance slows down the death rate of most of the population. III) Persistence involves only a tiny proportion of the population, from 10<sup>-6</sup>% to 1% in natural populations [7], that benefits from a low death rate associated with low metabolic activity. This persistent state allows bacterial cells to cope with a broad range of stresses, albeit being genetically susceptible. Indeed, the size of a population exposed to antibiotics and containing persister cells first quickly decreases owing to the death of susceptible and metabolically-active cells, before experiencing a much slower decrease due to the death of persister quiescent cells. This physiological state is not heritable; hence, if a population regenerated from the persister sub-population is re-exposed to the antibiotic, a similar phenotypic heterogeneity

44 will typically be observed again. This phenomenon allows growth rescue and restart after  
45 many stresses including nutrient depletion, temperature change, acid, oxidative or os-  
46 motic challenges, phage infection, and exposure to heavy metals or antibiotics [6,8].

47 Persistence is a natural process that evolved before the anthropogenic use and abuse  
48 of antibiotics. It might exist in all living organisms as it has been observed in all studied  
49 bacterial species [6,9], in eukaryotic cells resulting in cancer relapse [9–12], and even acci-  
50 dentally in digital organisms that learned to play dumb randomly at a low rate [13]. Un-  
51 derstanding the evolutionary forces driving persistence emergence and maintenance may  
52 have far-reaching sanitary consequences. Indeed, persistence contributes to the relapse of  
53 many infections [14–17], including recurrence of mycobacterial infections in 10% of pa-  
54 tients [18]. Moreover, persistence may have indirect effects on the evolution of antibiotic  
55 resistance as it can increase: i) mutation rates, ii) horizontal gene transfer rates, and iii)  
56 survival to antibiotics of susceptible cells by allowing repeated antibiotic exposures that  
57 select for progressive increase of antibiotic resistance [6,19]. Therefore, persistence is likely  
58 an important driver of antibiotic resistance evolution.

59 Although first described more than 70 years ago [20], the evolutionary forces driving  
60 persistence are still not well understood. It is important to emphasize that persistence is a  
61 typical case of phenotypic stochasticity, *i.e.*, genetically identical bacterial cells that behave  
62 differently in given environments. This phenotypic stochasticity may either pre-exist to  
63 the stress (type I persister cells) or be induced by it (type II persister cells) [15,21]. Beyond  
64 persistence, stress-induced phenotypic stochasticity is a general feature of living organ-  
65 isms that is observed in many taxa and organization levels, such as increased develop-  
66 mental noise in plants [22], bears [23], fishes [24], *Drosophila* [25] (for reviews, see [26–  
67 30]).

68 There is a current debate about the evolutionary meaning of phenotypic stochasticity  
69 [31–34], including persistence. It is hypothesized to be either an unavoidable consequence  
70 of biological constraints or an adaptive process related to bet-hedging. According to the  
71 first hypothesis, any phenotype has a minimal amount of random variance. In addition,  
72 this variance can be increased by stresses which may lead to random abnormal pheno-  
73 types by causing cell alterations. Indeed, stresses will hamper mechanisms selected to re-  
74 duce phenotypic stochasticity (developmental stability [35]), thereby resulting in a mini-  
75 mal amount of phenotypic stochasticity. For example, acid and temperature stresses can  
76 lower protein conformational stability [36]. In the second hypothesis, by increasing the  
77 probability that few individual cells are adapted to the stress, this variability may be ad-  
78 vantageous and thus selected for, leading to the evolution of bet-hedging [37]. For exam-  
79 ple, cells from all life kingdoms have a mistranslation mechanism that is activated as a  
80 stress response [30]. This discrepancy between the two hypotheses is particularly relevant  
81 for persistence [7]. Levin et al. [38] emphasized that persistence might be related to errors  
82 in cellular processes that block cells in almost inactive states. In agreement, a large number  
83 of mutations can result in increased persistence frequency [39], while no mutation has  
84 ever been found to prevent it [40], supporting the hypothesis that persistence is merely a  
85 result of biological constraints. On the other hand, some persister cells can actively pump  
86 antibiotics out from cells [41,42], and their proportion in the population may evolve rap-  
87 idly, suggesting an adaptive process. Indeed, chronic bacterial infections evolved an in-  
88 creased rate of persistence after antibiotic treatment [43–46].

89 Laboratory evolution experiments confirmed the high persistence evolvability. In the  
90 presence of antibiotics, a 100- to 1000-fold increase in persistence has indeed been reported  
91 after only two to three cycles of antibiotic selection (less than five days) [47]. In contrast to  
92 antibiotic resistance, the production of a small proportion of persister cells entails low cost  
93 to the population. Therefore, restoring the initial level of persistence is a slow process,  
94 requiring hundreds to thousands of generations [47]. Hence, long-term experimental evo-  
95 lution in the absence of killing stressors such as antibiotics is particularly relevant to study  
96 persistence evolution. Here, we used the long-term evolution experiment (LTEE) that was

initiated in 1988, during which twelve populations are propagated from a common *Escherichia coli* ancestor in a glucose-limited, antibiotic-free environment [48]. We recently showed that susceptibility to many antibiotics increased over time in these conditions in which bacteria were selected for faster growth for more than three decades [49].

We investigated the evolution of persistence for ampicillin and ciprofloxacin by comparing their effects in the ancestor and evolved clones sampled in each of the twelve populations up to 50,000 generations. We improved a high-throughput methodology [50] to estimate the prevalence of persisters while accounting for growth rate heterogeneity.

## 2. Results

We performed two sets of analyses. First, in the ‘LTEE-50K’ analysis, we compared persistence to the two antibiotics ampicillin and ciprofloxacin of one clone sampled at 50,000 generations from each of the 12 populations of the LTEE to their respective ancestors REL606 and REL607. Second, in the ‘Ara-2\_S\_L’ analysis, we investigated the persistence level within the population called Ara-2 (Table 1) in which an adaptive diversification event occurred. Indeed, two phenotypically-distinct ecotypes, called S and L, emerged by generation 6,500 and co-exist ever since [51]. We sampled 10 evolved clones from Ara-2, including one from each generation 2,000 and 5,000 before the emergence of this polymorphism, and one S and L clone from each generation 6,500, 11,000, 20,000 and 50,000 (Table 1).

Table 1: List of the LTEE-derived clones used in this study.

| Clone  | LTEE population | Generation | Mutator state* | Analyses** |           |
|--------|-----------------|------------|----------------|------------|-----------|
| 606    | Ancestor (Ara-) | 0          | N              | LTEE-50K   | Ara-2_S_L |
| 607    | Ancestor (Ara+) | 0          | N              | LTEE-50K   | Ara-2_S_L |
| 11330  | Ara-1           | 50,000     | M              | LTEE-50K   |           |
| 1165A  | Ara-2 (BC***)   | 2,000      | N              |            | Ara-2_S_L |
| 2180A  | Ara-2 (BC***)   | 5,000      | M              |            | Ara-2_S_L |
| 6.5KS1 | Ara-2 (S)       | 6,500      | M              |            | Ara-2_S_L |
| 6.5KL4 | Ara-2 (L)       | 6,500      | M              |            | Ara-2_S_L |
| 11KS1  | Ara-2 (S)       | 11,000     | M              |            | Ara-2_S_L |
| 11KL1  | Ara-2 (L)       | 11,000     | M              |            | Ara-2_S_L |
| 20KS1  | Ara-2 (S)       | 20,000     | M              |            | Ara-2_S_L |
| 20KL1  | Ara-2 (L)       | 20,000     | M              |            | Ara-2_S_L |
| 13335  | Ara-2 (S)       | 50,000     | N              | LTEE-50K   | Ara-2_S_L |
| 11333  | Ara-2 (L)       | 50,000     | M              | LTEE-50K   | Ara-2_S_L |
| 11364  | Ara-3           | 50,000     | M              | LTEE-50K   |           |
| 11336  | Ara-4           | 50,000     | M              | LTEE-50K   |           |
| 11339  | Ara-5           | 50,000     | N              | LTEE-50K   |           |
| 11389  | Ara-6           | 50,000     | N              | LTEE-50K   |           |
| 11392  | Ara+1           | 50,000     | N              | LTEE-50K   |           |
| 11342  | Ara+2           | 50,000     | N              | LTEE-50K   |           |
| 11345  | Ara+3           | 50,000     | M              | LTEE-50K   |           |
| 11348  | Ara+4           | 50,000     | N              | LTEE-50K   |           |
| 11367  | Ara+5           | 50,000     | N              | LTEE-50K   |           |
| 11370  | Ara+6           | 50,000     | M              | LTEE-50K   |           |

\*The mutator (M) or non-mutator (N) state is indicated.

\*\*See text below, section “Rationale of data analyses”.

\*\*\*BC, before co-existence.

To quantify persistence after a 5-hour antibiotic exposure, we performed a ten-fold dilution cascade, from  $10^0$  to  $10^7$ . For each dilution, we recorded the bacterial culture revival, *i.e.* the presence/absence of growth after 24h and, if revival, we quantified the number of persister cells by analyzing the growth curve (initial OD approach described hereafter). Absence of growth after 24h was related to either the absence of persister cells or a number of persister cells too low for their revival and detection. In this case, we set the number of persister cells to zero.

### 2.1 Validation of the initial OD approach to quantify persister cells

We adapted the approach used by Hazan et al. [50] by recording the intercept of a linear model fitted to the  $\log_2$  of the growth curve, which is an estimate of the initial OD (hereafter, initial OD), instead of recording the time needed to reach a threshold OD called the Start Growth Time (SGT). This approach avoids biases induced by growth rate variations and can detect tiny variations in initial OD (Appendix A). However, as the SGT approach [50], it assumes that the lag time for cell regrowth is unaffected by the antibiotic treatment, although it is known to differ between persister and non-persister cells [21]. We accounted for this approximation by referring, for this estimated number of persister cells (CFU number), to an Equivalent Number of Normal Cells (#EqNC), *i.e.*, the initial number of cells that would have yielded the same initial OD in the absence of antibiotic exposure.

To validate this initial OD approach, we checked that, on average, the ten-fold dilution series yielded ten-fold differences in the #EqNC. In that case, the average of the slopes of models predicting  $\log_{10}(\#EqNC)$  by  $\log_{10}(\text{dilution})$  should be equal to one. We found an average of 0.97 with a bootstrap 95%CI of [0.90; 1.05].

### 2.2 Evolution of persistence in the 'LTEE-50K' analysis

For each growth curve, we estimated initial OD and used standard curves specific to each strain for conversion into CFUs (#EqNC, Appendix A). We used a linear mixed model to estimate the mean #EqNC and its confidence interval for each clone (Table 1) and treatment (ampicillin, ciprofloxacin, no antibiotics). This model predicts the  $\log_2(\#EqNC)$  of each growth curve as a function of, as fixed effects,  $\log_{10}$  of the dilution, antibiotic treatment, clone ID, and two second-order interactions with the antibiotic treatment, and random effects on these fixed effects. All fixed effects were highly significant (Table 2).

Table 2: Tests of the fixed effects of the model analyzing the #EqNC.

| Variable                                         | df         | F-value | p-value |
|--------------------------------------------------|------------|---------|---------|
| $\log_{10}(\text{dilution})$                     | 1, 100.58  | 595.11  | <0.001  |
| Clone ID                                         | 23, 59.92  | 48.86   | <0.001  |
| Antibiotic                                       | 2, 1342.65 | 144.94  | <0.001  |
| Antibiotic $\times$ $\log_{10}(\text{dilution})$ | 2, 131.47  | 7.63    | <0.001  |
| Antibiotic $\times$ clone ID                     | 44, 399.89 | 9.45    | <0.001  |

P-values of fixed effects are based on F-tests with Satterthwaite's approximation. The corresponding numerator and denominator degrees of freedom (df) and statistics of the tests (F-values) are given.

#### 2.2.1 Overall trends in the persistence level to ampicillin and ciprofloxacin.

We analyzed the estimated #EqNC for each investigated clone and treatment (coefficients of the model summarized in Table 2 and shown Figure 1). We found that the overall level of persistence to ciprofloxacin and ampicillin was similar (bootstrapped paired *t*-test implemented in the R package MKinfer: *p*-value = 0.22), and positively correlated (Spearman rank correlation = 0.508; *p*-value = 0.014; Figure 1). However, this pattern varied according to the clones. Six of the twelve populations evolved a mutator phenotype owing to mutations in DNA repair genes before 50,000 generations (Table 2; [52]). We found no

165 association between the persistence level and the mutator/non-mutator state of the popu-  
166 lations (linear mixed model,  $p$ -value of the interaction between mutator state and treatment  
167 = 0.94). Nevertheless, the positive correlation between persistence to ciprofloxacin and am-  
168 picillin was mostly driven by the non-mutator clones (Spearman rank correlations = 0.87  
169 and 0.08;  $p$ -values = 0.003 and 0.78, respectively for the non-mutator and mutator clones).  
170 A permutation test comparing these two correlations yielded a  $p$ -value of 0.037 (50,000 per-  
171 mutations of  $|\sigma_{mutator} - \sigma_{non-mutator}|$ ).

172 The among-strain variability for persistence to ciprofloxacin was higher than to am-  
173 picillin (Ansari-Bradley test  $AB = 331$ ;  $p$ -value = 0.016; Figure 1). There was no correlation  
174 between persistence and resistance to these antibiotics [49] (Spearman rank correlations =  
175 0.365 and 0.074;  $p$ -values = 0.22 and 0.81 for ampicillin and ciprofloxacin, respectively).  
176

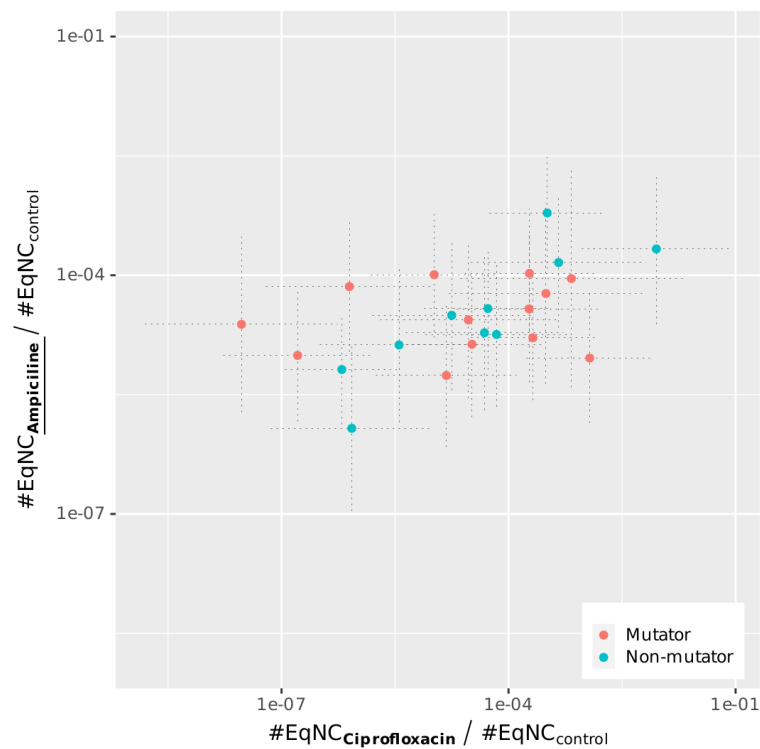

177  
178 Figure 1: Persistence to ampicillin vs. ciprofloxacin in evolved clones sampled from each of the 12 LTEE  
179 populations.

180 For each clone (Table 2), the abundance of persister cells to ampicillin and ciprofloxacin was quantified by the  
181 ratio between the #EqNC in the treatment and the control. Each dot corresponds to a given clone and gives the  
182 abundance of persister cells to the two antibiotics. Dotted lines give the 95 % CI. These values were obtained  
183 from the coefficients of the models (Table 2).

### 184 185 2.2.2 Evolution of persistence after 50,000 generations of evolution

186 We first showed that there was no significant difference in the level of persistence  
187 between the two ancestral clones REL606 and REL607 ( $p$ -values = 0.20 and 1 for ampicillin  
188 and ciprofloxacin, respectively). Then, we performed both comparisons of each evolved  
189 clone to each of the two ancestral strains and pairwise comparisons among the 13 clones  
190 sampled at generation 50,000 using the model coefficients (Table 2; Figure 2). Evolution  
191 of persistence to ciprofloxacin of the S clone from population Ara-2 was the only signifi-  
192 cant difference compared to the ancestors ( $p$ -value = 0.01; Figure 2). However, the pairwise

193  
194  
195  
196  
197  
198

comparisons among clones from generation 50,000 had more statistical power and detected significant changes in the level of persistence to ciprofloxacin. Persistence was: i/ higher in the Ara+4 clone than in clones from populations Ara-3, Ara-4, Ara-5, Ara-6, Ara+2, Ara+3 and the S clone from Ara-2; ii/ higher in the Ara+5 and Ara+6 clones than in clones from populations Ara-4 and Ara+2 and the S clone from Ara-2 (Supplementary materials, Table S1, S2, and S3).

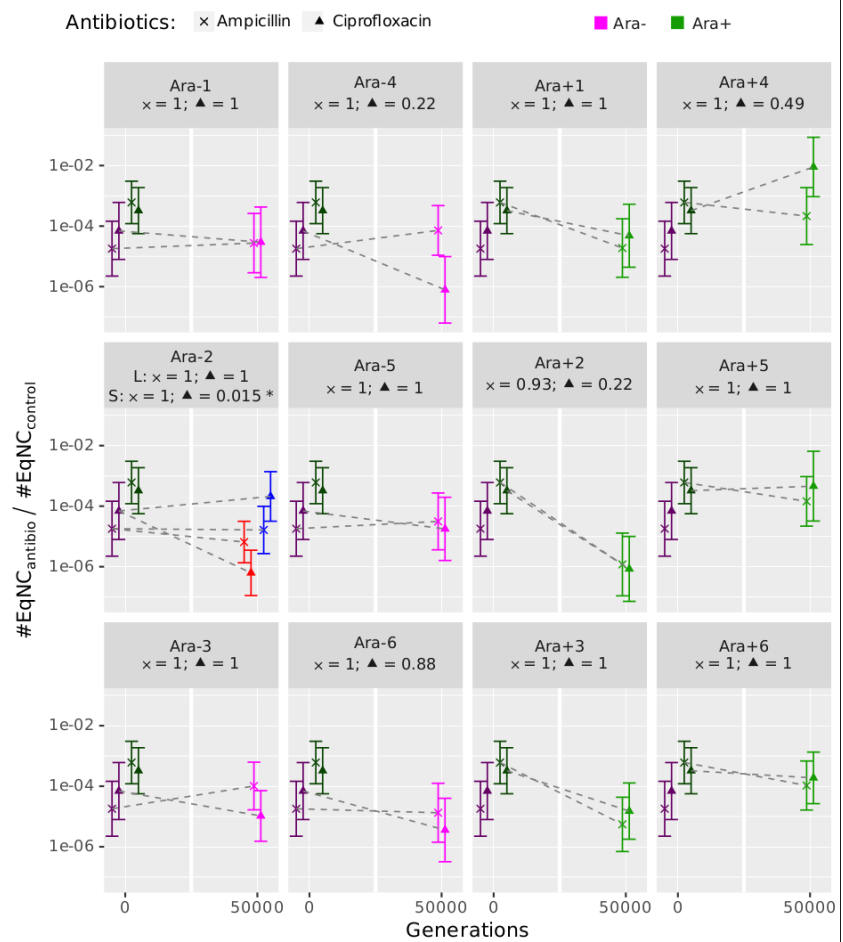

199  
200  
201  
202  
203  
204  
205  
206  
207  
208

Figure 2: Evolution of persistence to ampicillin (x) and ciprofloxacin (▲) in evolved clones sampled from the 12 LTEE populations. For each antibiotic, we compared the level of persistence of each evolved clone sampled at generation 50,000 to the one in each of the two ancestors REL606 and REL607, and to be conservative, only the least significant of the two comparisons was kept for each evolved clone. The p-values for each antibiotic are shown below the name of the population (and for each of the S and L ecotypes in population Ara-2, in red and blue respectively). These values were obtained from the coefficients of the models summarized in Table 2. 95% confidence intervals are shown. Dark symbols represent the ancestor strains, pink the clones from the Ara-1 to Ara-6 populations, and green the clones from the Ara+1 to Ara+6 populations. Significance codes: 0 '\*\*\*\*' 0.001 '\*\*\*' 0.01 '\*\*' 0.05 '\*' 0.1 '.' ' ' 1.

209  
210  
211  
212  
213  
214

### 2.3 Evolution of persistence in the 'Ara-2\_S\_L' analysis

We investigated the interplay between the adaptive diversification event that occurred in population Ara-2 and the evolution of persistence. The emergence of diversification was detected between generations 5,000 and 6,500, leading to the co-existence of two ecotypes called Ara-2L and Ara-2S [51]. From generation 11,000 to 50,000, each Ara-2S sampled clone had a significantly lower level of persistence to ciprofloxacin compared

215  
216  
217

to both the ancestors and the corresponding contemporary Ara-2L sampled clone, while there were no significant differences for persistence to ampicillin (Figure 3).

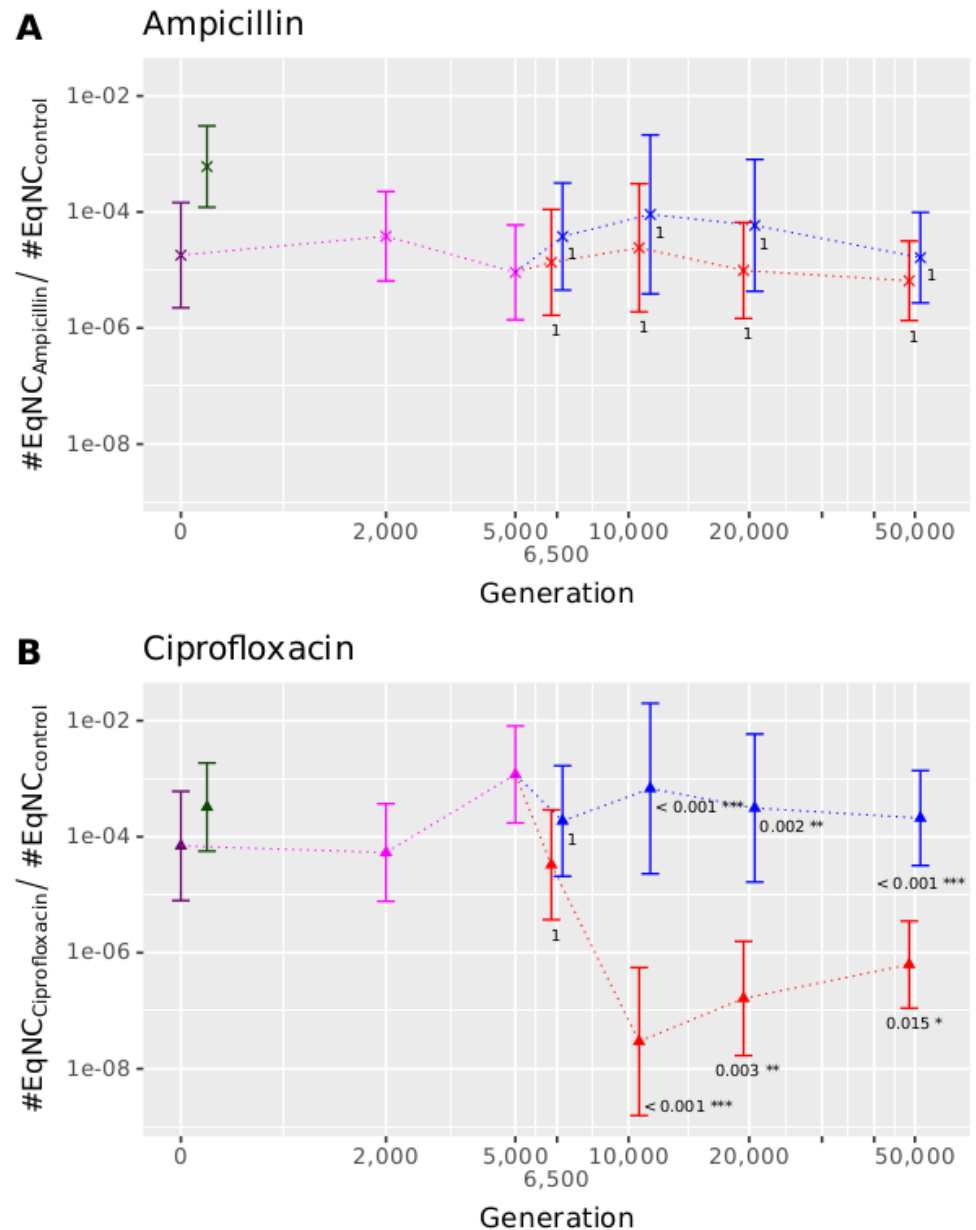

218  
219  
220  
221  
222  
223  
224

Figure 3: Evolution of persistence to ampicillin (A) and ciprofloxacin (B) in evolved clones sampled from the Ara-2 population. Dark symbols represent the ancestor strains REL606 and REL607, pink the Ara-2 evolved clones sampled before the adaptive diversification event, red and blue the evolved clones from the S and L ecotypes, respectively. P-values close to the Ara-2S evolved clones refer to the comparisons to the ancestors, and p-values close to the Ara-2L evolved clones refer to the comparison between the co-existing contemporary S and L evolved clones. 95% confidence intervals are shown.

225

226

### 3. Discussion

227  
228

We investigated the evolution of bacterial persistence during the LTEE over 50,000 generations, corresponding to 22 years during which bacterial cells were maintained in a

229 defined antibiotic-free environment [53]. Environmental variations included the daily cycles of feast and famine and changes produced by bacteria themselves, as for example  
230 secretion of metabolic byproducts [54]. We improved a high-throughput method to quantify  
231 persister cells by accounting for growth rate heterogeneity. Despite evolutionary potential  
232 for lower persistence, it was not observed in most cases in this antibiotic-free environment.  
233  
234

235 Studying persistence is complex because: i/ persistent cells are genetically identical  
236 to non-persistent cells, ii/ it is rare in entire populations, iii/ persistence state is not heritable,  
237 and iv/ once in the persistence state, cells do not multiply. Here, we improved a previously  
238 published method [50] to quantify persister cells. This approach relied on analyzing the  
239 growth curve of the bacterial population that recovered from the stress that killed non-persistent  
240 cells. The more persister cells, the faster the growth of the reviving population, which thereby  
241 becomes detectable. This approach assumed that the growth rate is constant among treatments.  
242 We however showed that this was not the case for persister cells (Supplementary material, Fig. S1).  
243 Therefore, we fitted linear models on the  $\log_2$  of each growth curve, which estimates the growth  
244 rate and initial population density.

245 We detected no relationship between the levels of persistence and antibiotic resistance [49],  
246 thereby showing that the two phenomena are related to two different pathways in the conditions  
247 of the LTEE where there is no antibiotic pressure but selection for growth. Similar results were  
248 observed in natural strains of *Pseudomonas* spp. [55].

249 Overall, among the LTEE clones, the level of persistence to the two antibiotics was similar  
250 and positively correlated, suggesting similar physiological pathways. However, the positive  
251 correlation was only driven by non-mutator strains, and the among-strain variation was  
252 significantly higher for ciprofloxacin than ampicillin. In addition, we detected no significant  
253 differences among clones for ampicillin by contrast to ciprofloxacin. This suggests the  
254 existence of different types of persister cells, some being shared between ampicillin and  
255 ciprofloxacin, and some that are specific to each antibiotic. The observed among-clone  
256 variation would result from both types of persister cells, those common to the two  
257 antibiotics explaining the correlation in the non-mutators and those specific to each  
258 antibiotic explaining the difference between the two antibiotics in among-clone variance.  
259 In agreement with this diversity of persister cells, it has been observed that a large  
260 panel of pathways can trigger persistence [15], and the correlation between persistence to  
261 different antibiotics is variable. Hence, a marginally significant correlation between the  
262 persistence to ampicillin and nalidixic acid was found in environmental samples of *E. coli*  
263 [56], but no correlation between the persistence to these two antibiotics and to ciprofloxacin,  
264 albeit ciprofloxacin and nalidixic acid share a similar mechanism of action. A similar  
265 analysis by Stewart and Rozen [57] revealed no correlation in the level of persistence to  
266 ampicillin, streptomycin, and norfloxacin.

267 Persistence in the ancestral strains REL606 and REL607 may originate from either  
268 past selection by environmental stochasticity or minimal amount of 'cellular errors'. In the  
269 former case, we would expect no evolution of persistence and a higher amount of persister  
270 cells in mutator clones because the mutational target for higher persistence is large [39].  
271 In addition, if persistence in the ancestor results from adaptation to former environmental  
272 stochasticity, the naïve prediction would be a reduced persistence level in most, if not all,  
273 LTEE populations that evolved under strong selection for improved growth during 22  
274 years in a constant environment. Indeed, bacteria have a strong capacity to adapt to cyclic  
275 or correlated environmental changes [58–61], and shifting to a random dormancy state  
276 should be costly as any growing mutant among other dormant cells would have a higher  
277 growth rate.

278 By contrast to these two alternative predictions, we detected no relationship between  
279 persistence and mutator state, and only one of the 13 analyzed clones (from the Ara–2S  
280 ecotype) showed significant evolution toward lower persistence. Evolved clones from the  
281 two populations Ara–4 and Ara+2 evolved lower persistence that was only significant  
282 when compared to clones that evolved higher persistence (from populations Ara+4, Ara+5



283 and Ara+6). These results show an evolutionary potential for both higher and lower per-  
284 sistence, but in most cases, the stable LTEE environment did not select for low persistence.

285 The only clone revealing lower persistence is the 50,000-generation Ara-2S clone. In-  
286 terestingly, its relative fitness compared to its contemporary clone from the Ara-2L eco-  
287 type is higher during stationary phase than exponential phase [62,63]. Indeed, while the  
288 Ara-2L clone was starving from glucose, the Ara-2S clone consumed the acetate produced  
289 during growth on glucose [64]. Hence, it might favor dormancy of the Ara-2L clone dur-  
290 ing stationary phase to lower both its energy consumption and death rate, while the Ara-  
291 2S clone was actively growing on acetate. This hypothesis is particularly appealing since  
292 starvation has been shown to be a main natural cause of persistence evolution [6,21,65].  
293 Hence, persistence may provide benefits to starvation in natural environments because  
294 feast and famine phases are poorly predictable. By contrast in the LTEE, bacteria experi-  
295 ence a seasonal and predictable environment every day since more than three decades,  
296 oscillating between exponential phase (feast) and stationary phase (famine). Because of  
297 such reduced stochasticity in the LTEE between the different growth seasons, randomly  
298 switching a small proportion of cells into dormancy may not be a beneficial strategy.

299 Further studies may investigate the influence of the daily starvation phase in the  
300 maintenance of persistence during the LTEE. Alternatively, the observed variability  
301 among the evolutionary trajectories of persistence might result from pleiotropic interac-  
302 tions between persistence and other selected traits. According to this scenario, the varia-  
303 bility in evolutionary trajectories of different populations would result from some contin-  
304 gencies and would be a side effect of the divergence of populations. Understanding these  
305 pleiotropic interactions would be very useful to optimize the treatments of infections or  
306 cancers. Indeed, this might allow to pre-evolve an infecting bacterial cell population or a  
307 cancer cell population to have a low persistence to the future treatment.

308 The conundrum of the unexpected maintenance of persistence in a stable environ-  
309 nment over 50,000 bacterial generations, albeit evolutionary potential for decreasing the  
310 amount of persistence as observed in the Ara-2S clone, highlights the LTEE importance  
311 for challenging and testing our understanding of evolution.  
312

#### 313 4. Materials and Methods

##### 314 Strains

315 We used a total of 23 *E. coli* clones that are all derived from the LTEE: the two ances-  
316 tral clones REL606 and REL607, the latter being a spontaneous Ara+ revertant of REL606  
317 [53,66], one evolved clone sampled at 50,000 generations from 11 of the 12 LTEE popula-  
318 tions, and 10 evolved clones from the population called Ara-2 (Table 1). Indeed, the pop-  
319 ulation Ara-2 experienced an adaptive diversification event during which two phenotyp-  
320 ically-distinct ecotypes, called S and L, emerged by generation 6,500 and co-exist ever  
321 since [51]. Therefore, we sampled one Ara-2 evolved clone from generations 2,000 and  
322 5,000 before the emergence of this polymorphism, and one S and L clone at each of the  
323 generations 6,500, 11,000, 20,000 and 50,000 (Table 1).  
324

##### 325 Measuring the proportion of persister cells

326 For each LTEE-derived clone, we estimated the amount of persister cells after expo-  
327 sure to each of two bactericidal antibiotics belonging to two different families, ampicillin  
328 and ciprofloxacin, by hypothesizing that the larger the persister population is, the faster  
329 regrowth will happen and therefore be detectable by optical density [49, see below].

330 All clones were grown in DM1000 medium (Davis Minimal broth supplemented with  
331 glucose at 1 g/L) at 37°C and 180 rpm. This high glucose concentration improves the ac-  
332 curacy of the OD measure during regrowth after antibiotic exposure. After overnight cul-  
333 ture, stationary-phase cells were diluted at 1/1000 in 500 mL DM1000. After 2.5h of growth  
334 (mid-exponential phase), we divided each culture into nine 5-mL tubes that were subdiv-  
335 ided into three groups, *i.e.*, three technical replicates per group. In the two first groups,

336 we added either ampicillin or ciprofloxacin at a final concentration of 100 and 1  $\mu\text{g}/\text{mL}$ ,  
337 respectively. The third group was used as an antibiotic-free control. After 5 hours at 37°C  
338 and 180 rpm, we removed antibiotics by three successive washes consisting in 5-min cen-  
339 trifugation at 1500g, removal of 90% of the supernatant and resuspension of the pellet in  
340 antibiotic-free DM1000. Finally, cells were resuspended in 200  $\mu\text{L}$  DM1000 and each tube  
341 content was transferred into a well of a 96-well microplate (Thermo Scientific 260860). We  
342 performed for each initial tube tenfold dilution cascades from  $10^0$  to  $10^7$  fold, and moni-  
343 tored growth in an Infinite M200 microplate reader (Tecan®) to quantify the proportion of  
344 persister cells for each clone. We recorded the  $\text{OD}_{600}$  every 15 min for 24 h that we will use  
345 as the ‘time’ variable in our analysis (see below). In addition for each antibiotic-free con-  
346 trol tube, we estimated the CFU number to compute the relationship between the number  
347 of cells and the time after which regrowth was detected by OD. We performed at least  
348 three biological replicates for each clone.

### 350 Rationale of data analyses

351 All analyses were performed to: i) compare the persistence frequency in each of the  
352 12 evolved clones sampled at 50,000 generations to the corresponding ancestor REL606 or  
353 REL607, and ii) analyze the evolutionary dynamics of persistence in the population Ara-  
354 2 in which the S and L ecotypes emerged by generation 6,500 and co-exist since then [67].  
355 We refer hereafter to these two analyses as LTEE-50K and Ara-2\_S\_L, respectively (Table  
356 1).

### 358 Quantification of the population size of persister cells

359 We improved a previous approach [50] that is similar to qPCR as the time needed to  
360 detect an increase in the signal (here,  $\text{OD}_{600}$ ) is proportional to the initial amount of mate-  
361 rial (here, the number of persisters cells). Hence, the time needed to reach a given  $\text{OD}_{600}$   
362 threshold is defined as the Start Growth Time, SGT [50]. This approach however assumed  
363 that persister cells have both a growth rate and a lag phase that are similar to the cells of  
364 the cultures used for the standard curve, albeit they were not exposed to antibiotics (Fig.  
365 A1e). Comparing the growth rates of each strain in each treatment showed that persister  
366 cells actually had a slower growth rate than other cells. For unknown reasons, this differ-  
367 ential effect was stronger for ciprofloxacin than ampicillin (Supplementary material,  
368 Fig. S1). Therefore, we developed an alternative approach based on a statistical model that  
369 predicted the  $\log_2$  of the  $\text{OD}_{600}$  observed during exponential growth as a function of time  
370 (Supplementary material, Heuristic selection of the exponential growth phase). These  
371 models estimate both the growth rate (slope) and initial  $\text{OD}_{600}$  (intercept; hereafter,  
372  $\widehat{\text{initial OD}}$ ) for each growth curve. This approach can detect tiny variations in initial OD as  
373 they increased during exponential growth (for more details, see Appendix A). Using this  
374 approach, we obtained  $\widehat{\text{initial OD}}$  for each growth curve and converted it into cell numbers  
375 using standard curves obtained for each strain by quantifying both  $\widehat{\text{initial OD}}$  and CFUs in  
376 dilution series (Fig. A1d).

377 However, while this approach accounted for growth rate heterogeneity, it still as-  
378 sumed that the mean lag time for cell regrowth was identical in all strains and treatments.  
379 Hence, we refer to this estimated number of persister cells (number of CFU) as an Equiv-  
380 alent Number of Normal Cells (#EqNC), corresponding to the initial number of cells that,  
381 in the absence of antibiotics, would have produced the same  $\widehat{\text{initial OD}}$ . In the absence of  
382 growth after 24h, the #EqNC was set to zero. To validate this  $\widehat{\text{initial OD}}$  approach, we  
383 checked that the ten-fold dilution series indeed yielded ten-fold differences in the esti-  
384 mated amount of persister cells (#EqNC). Specifically, we used the  $\widehat{\text{initial OD}}$  approach to  
385 estimate #EqNC separately for each growth curve. Then, for each dilution series, we fitted  
386 a model predicting  $\log_{10}(\#EqNC)$  by  $\log_{10}(\text{dilution})$ . If the ten-fold dilutions resulted in  
387 an averaged ten-fold difference in the number of persister cells, these models should have  
388 a slope of one that we checked by bootstrapping the slopes.

336  
337  
338  
339  
340  
341  
342  
343  
344  
345  
346  
347  
348  
349  
350  
351  
352  
353  
354  
355  
356  
357  
358  
359  
360  
361  
362  
363  
364  
365  
366  
367  
368  
369  
370  
371  
372  
373  
374  
375  
376  
377  
378  
379  
380  
381  
382  
383  
384  
385  
386  
387  
388  
389

### Estimating and comparing persistence

We estimated the level of persistence to ampicillin and ciprofloxacin in each strain by fitting a linear mixed model predicting  $\log_2(\#EqNC)$  with as i/ fixed effects: the  $\log_{10}$  of the dilution factor, the antibiotic treatment, the clone, and the two second-order interactions with antibiotic treatments, ii/ random effects: ‘replicates’ on the intercept, the three fixed effects ‘dilution’, ‘treatment’ and their interaction. The intercept of these models estimates the mean  $\log_2(\#EqNC)$  in the non-diluted sample, *i.e.*, when  $\log_{10}$  of the dilution is equal to zero.

We fitted this model with the lme4 package [68] of the R version 4.0.3 and tested significance of effects with F tests and the Satterthwaite approximation for degrees-of-freedom [69,70] (Table 2). We compared clones to each other using the R package ‘multcomp’ (version 1.4-17; [71]). For each antibiotic, we compared each evolved strain to the two ancestors REL606 and REL607. This first set of tests was used to: i/ check for the absence of significant differences between the two ancestors, and ii/ assess whether the evolved clones were significantly different from their ancestors. To be conservative when detecting changes, only clones that were significantly different from both ancestors were considered as being significantly different. We also performed pairwise comparisons between 50,000-generation clones to detect groups of clones that evolved in opposite directions. Finally, we used this test to compare contemporary co-existing clones Ara-2 L and S.

### Relationship between persistence and mutator phenotype

To test for an effect of the mutator phenotype on persistence, we re-fitted the linear mixed model predicting  $\log_2(\#EqNC)$  by setting the two variables clone and interaction between clone and treatment as a random instead fixed effect, and by adding, as fixed effect, the mutator state and its interaction with the treatment. Furthermore, we assessed the effect of the mutator state on the correlation between persistence to ampicillin and ciprofloxacin using Spearman rank correlations. Specifically, we measured and tested correlation ( $\sigma$ ) among all clones and then separately among mutator and non-mutator clones. We tested for the significance of the difference between mutator and non-mutator clones using 50,000 permutations of the statistic  $|\sigma_{mutator} - \sigma_{non-mutator}|$ .

**Supplementary Materials:** The following is available online at [www.mdpi.com/xxx/s1](http://www.mdpi.com/xxx/s1), **Table S1:** ‘Pairwise comparisons of the abundance of ciprofloxacin persister cells in the evolved clones sampled from each of the 12 LTEE populations at 50,000 generations’; **Table S2:** ‘Pairwise comparisons of the abundance of ampicillin persister cells in the evolved clones sampled from each of the 12 LTEE populations at 50,000 generations’; **Table S3:** ‘Pairwise comparisons of the abundance of ciprofloxacin persister cells in the evolved clones sampled from each of the 12 LTEE populations at 50,000 generations’; **Figure S1:** ‘Effect of antibiotics on growth rates’; **Supplementary method 1:** ‘Heuristic selection of the exponential growth phase’; **Figure S2:** ‘Variability in background OD for the wells of a representative microplate’; **Figure S3:** ‘Illustration of the detection of the exponential phase in the growth curve’

**Author Contributions:** Experimental design, D.S., J.G. and M.M.; Realization of the experiments, M.M., J.G., R.A. and H.M.H.; Design of the data analysis, H.M.H.; Data analysis, R.A., and H.M.H.; writing—original draft preparation, H.M.H; writing—review and editing, D.S., J.G., and H.M.H.; funding acquisition, D. S. All authors have read and agreed to the published version of the manuscript.

**Funding:** This research was funded by Agence Nationale de la Recherche, grant number ANR-18-CE35-0005-04; by the Centre National de la Recherche Scientifique, IRP PredEvo; and by the Université Grenoble Alpes.

**Institutional Review Board Statement:** Not applicable.

**Informed Consent Statement:** Not applicable.

441 **Data Availability Statement:** The data presented in this study are openly available in FigShare at  
442 doi: 10.6084/m9.figshare.19209690, reference number XXX Data are not yet publically available, but  
443 they can be accessed here : <https://figshare.com/s/9782ddbefc25e0bce4b> .

444 **Acknowledgments:** We kindly thank Richard Lenski (Michigan State University, BEACON Center,  
445 USA) for the gift of strains and a long lasting collaboration. We thank Thomas Hindré for helpful  
446 discussions.

447 **Conflicts of Interest:** The authors declare no conflict of interest.

#### 448 **Appendix A: Estimation of the Equivalent Number of Normal Cells (#EqNC)**

449 We computed #EqNC by comparing how fast growth was detected compared to a  
450 standard curve that was obtained by quantifying living cells within a sample unexposed  
451 to antibiotics through CFU counting. To quantify persister cells from growth curves, Ha-  
452 zan et al. [50] measured how fast growth was detected as the time OD reached a given  
453 threshold (Start Growing Time), as in qPCR analyses. It assumed however that all com-  
454 pared strains had similar growth rates which was not the case since they are affected by  
455 antibiotics (Supplementary material, Fig. S1). We therefore developed an alternative ap-  
456 proach independent from this assumption. For each growth curve, we fitted a linear model  
457 to the  $\log_2$  of the OD from which the background OD has been removed. The slope and the  
458 intercept of these models estimate the growth rate and  $\log_2$  of the initial OD minus the back-  
459 ground OD, respectively. The estimated initial OD is proportional to the number of initial  
460 cells and is unaffected by the growth rate.

441  
442  
443  
444  
445  
446  
447  
448  
449  
450  
451  
452  
453  
454  
455  
456  
457  
458  
459  
460  
461

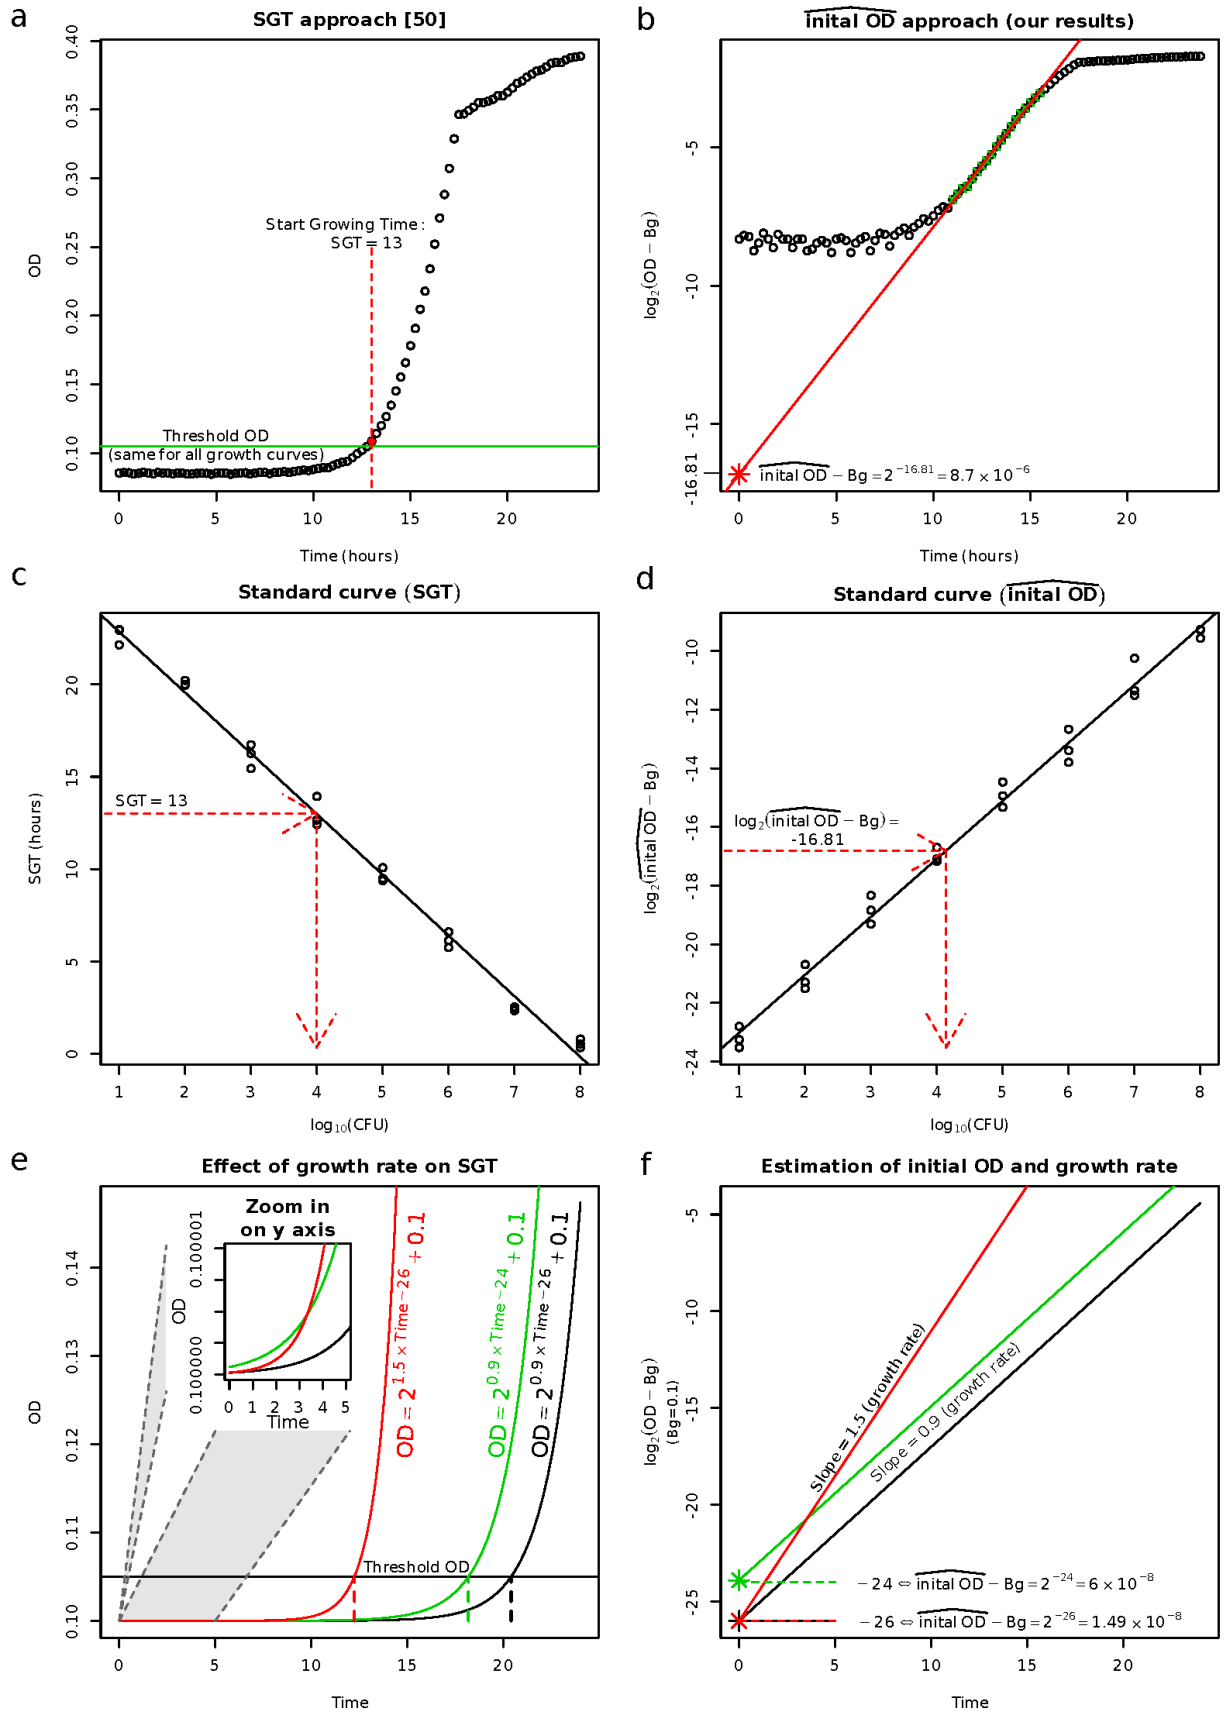

**Figure A1:** Estimation of the #EqNC by both the Start Growth Time (SGT; [50]) and initial OD (our approach).

Left and right panels respectively refer to the SGT and initial OD approaches. Panels a and b: representative real data as analyzed by each method, raw data for SGT and log of the

462  
463  
464  
465  
466  
467  
468  
469  
470  
471  
472  
473  
474  
475  
476  
477  
478  
479  
480  
481  
482  
483  
484  
485  
486  
487  
488  
489  
490  
491  
492  
493  
494  
495  
496  
497  
498  
499  
500  
501  
502  
503  
504  
505  
506  
507  
508  
509  
510  
511  
512  
513  
514

515 OD minus the background (Bg) for  $\widehat{\text{initial OD}}$  (see Supplementary method 1 for back-  
516 ground estimation). Panel a: the SGT approach yields an estimated SGT of 13, using a  
517 threshold of 0.105. Panel b: the linear model gives  $\widehat{\text{initial OD}} - \text{Bg} = 2^{-16.81}$ . Panels c and d:  
518 The standard curve is obtained by quantifying cells by both counting CFUs and analyzing  
519 the growth curves whatever the approach (SGT or  $\widehat{\text{initial OD}}$ ). If growth rates were similar  
520 when computing and using the standard curve, both approaches gave similar results. How-  
521 ever, as illustrated in panels e and f, the SGT approach started to be inaccurate when growth  
522 rates varied. Panels e and f: Simulated examples showing both the inaccuracy of the SGT  
523 approach and the robustness of the  $\widehat{\text{initial OD}}$  approach in the presence of growth rate vari-  
524 ation. Panel e: three theoretical growth curves obtained by assuming growth rates of 1.5,  
525 0.9, and 0.9 cell division per hour, for initial ODs of  $2^{-26}$ ,  $2^{-24}$ , and  $2^{-26}$ , respectively for the red,  
526 green and black curves. The SGT approach based on the OD threshold would detect more  
527 cells in, successively, the red, green and black curves. However, as illustrated in the inset  
528 zoom, this is an artefact induced by growth rate variation. Panel f: log-transformed OD al-  
529 lows the fit of a linear model that yields an estimate of both the growth rate and initial OD  
530 ( $\log_2(\widehat{\text{initial OD}} - \text{Bg})$ ).  
531

## 532 References

- 533 1. Interagency Coordination Group on Antimicrobial Resistance No Time to Wait: Securing the Future from Drug-  
534 Resistant Infections 2019.
- 535 2. Kraker, M.E.A.D.; Stewardson, A.J.; Harbarth, S. Will 10 Million People Die a Year Due to Antimicrobial Resistance  
536 by 2050? *PLoS Medicine* **2016**, *1*–6, doi:10.1371/journal.pmed.1002184.
- 537 3. Cassini, A.; Högberg, L.D.; Plachouras, D.; Quattrocchi, A.; Hoxha, A.; Simonsen, G.S.; Colomb-Cotinat, M.;  
538 Kretzschmar, M.E.; Devleeschauwer, B.; Cecchini, M.; et al. Attributable Deaths and Disability-Adjusted Life-Years  
539 Caused by Infections with Antibiotic-Resistant Bacteria in the EU and the European Economic Area in 2015: A  
540 Population-Level Modelling Analysis. *The Lancet infectious diseases* **2019**, *19*, 56–66.
- 541 4. Brauner, A.; Fridman, O.; Gefen, O.; Balaban, N.Q. Distinguishing between Resistance, Tolerance and Persistence  
542 to Antibiotic Treatment. *Nat Rev Microbiol* **2016**, *14*, 320–330, doi:10.1038/nrmicro.2016.34.
- 543 5. Balaban, N.Q.; Helaine, S.; Lewis, K.; Ackermann, M.; Aldridge, B.; Andersson, D.I.; Brynildsen, M.P.; Bumann, D.;  
544 Camilli, A.; Collins, J.J.; et al. Definitions and Guidelines for Research on Antibiotic Persistence. *Nat Rev Microbiol*  
545 **2019**, *17*, 441–448, doi:10.1038/s41579-019-0196-3.
- 546 6. Bakkeren, E.; Diard, M.; Hardt, W.-D. Evolutionary Causes and Consequences of Bacterial Antibiotic Persistence.  
547 *Nat Rev Microbiol* **2020**, *18*, 479–490, doi:10.1038/s41579-020-0378-z.
- 548 7. Van den Bergh, B.; Fauvart, M.; Michiels, J. Formation, Physiology, Ecology, Evolution and Clinical Importance of  
549 Bacterial Persisters. *FEMS Microbiology Reviews* **2017**, *41*, 219–251, doi:10.1093/femsre/fux001.
- 550 8. Jung, S.-H.; Ryu, C.-M.; Kim, J.-S. Bacterial Persistence: Fundamentals and Clinical Importance. *J Microbiol.* **2019**, *57*,  
551 829–835, doi:10.1007/s12275-019-9218-0.
- 552 9. Cohen, N.R.; Lobritz, M.A.; Collins, J.J. Microbial Persistence and the Road to Drug Resistance. *Cell Host and Microbe*  
553 **2013**, *13*, 632–642, doi:10.1016/j.chom.2013.05.009.
- 554 10. Sharma, S.V.; Lee, D.Y.; Li, B.; Quinlan, M.P.; Takahashi, F.; Maheswaran, S.; McDermott, U.; Azizian, N.; Zou, L.;  
555 Fischbach, M.A.; et al. A Chromatin-Mediated Reversible Drug-Tolerant State in Cancer Cell Subpopulations. *Cell*  
556 **2010**, *141*, 69–80, doi:10.1016/j.cell.2010.02.027.
- 557 11. Swayden, M.; Chhour, H.; Anouar, Y.; Grumolato, L. Tolerant/Persister Cancer Cells and the Path to Resistance to  
558 Targeted Therapy. *Cells* **2020**, *9*, 2601, doi:10.3390/cells9122601.

- 559 12. Vallette, F.M.; Olivier, C.; Lézot, F.; Oliver, L.; Cochonneau, D.; Lalier, L.; Cartron, P.-F.; Heymann, D. Dormant,  
560 Quiescent, Tolerant and Persister Cells: Four Synonyms for the Same Target in Cancer. *Biochemical Pharmacology*  
561 **2019**, *162*, 169–176, doi:10.1016/j.bcp.2018.11.004.
- 562 13. Lehman, J.; Clune, J.; Misevic, D.; Adami, C.; Altenberg, L.; Beaulieu, J.; Bentley, P.J.; Bernard, S.; Beslon, G.; Bryson,  
563 D.M.; et al. The Surprising Creativity of Digital Evolution: A Collection of Anecdotes from the Evolutionary  
564 Computation and Artificial Life Research Communities. *Artificial Life* **2020**, *26*, 274–306, doi:10.1162/artl\_a\_00319.
- 565 14. Fisher, R.A.; Gollan, B.; Helaine, S. Persistent Bacterial Infections and Persister Cells. *Nat Rev Microbiol* **2017**, *15*,  
566 453–464, doi:10.1038/nrmicro.2017.42.
- 567 15. Gollan, B.; Grabe, G.; Michaux, C.; Helaine, S. Bacterial Persisters and Infection: Past, Present, and Progressing.  
568 *Annu. Rev. Microbiol.* **2019**, *73*, 359–385, doi:10.1146/annurev-micro-020518-115650.
- 569 16. Fauvart, M.; De Groote, V.N.; Michiels, J. Role of Persister Cells in Chronic Infections: Clinical Relevance and  
570 Perspectives on Anti-Persister Therapies. *Journal of Medical Microbiology* **2011**, *60*, 699–709,  
571 doi:10.1099/jmm.0.030932-0.
- 572 17. Li, L.; Mendis, N.; Trigui, H.; Oliver, J.D.; Faucher, S.P. The Importance of the Viable but Non-Culturable State in  
573 Human Bacterial Pathogens. *Front. Microbiol.* **2014**, *5*, doi:10.3389/fmicb.2014.00258.
- 574 18. Lin, P.L.; Flynn, J.L. Understanding Latent Tuberculosis: A Moving Target. *J.I.* **2010**, *185*, 15–22,  
575 doi:10.4049/jimmunol.0903856.
- 576 19. Windels, E.M.; Michiels, J.E.; Fauvart, M.; Wenseleers, T.; Van den Bergh, B.; Michiels, J. Bacterial Persistence  
577 Promotes the Evolution of Antibiotic Resistance by Increasing Survival and Mutation Rates. *ISME J* **2019**, *13*, 1239–  
578 1251, doi:10.1038/s41396-019-0344-9.
- 579 20. Bigger, J. Treatment of Staphylococcal Infections with Penicillin by Intermittent Sterilisation. *Lancet* **1944**, 497–500.
- 580 21. Balaban, N.Q.; Merrin, J.; Chait, R.; Kowalik, L.; Leibler, S. Bacterial Persistence as a Phenotypic Switch. *Science* **2004**,  
581 305, 5.
- 582 22. Suter, L.; Widmer, A. Phenotypic Effects of Salt and Heat Stress over Three Generations in *Arabidopsis thaliana*.  
583 *PLoS ONE* **2013**, *8*, e80819, doi:10.1371/journal.pone.0080819.
- 584 23. Badyaev, A.V. Environmental Stress and Developmental Stability in Dentition of the Yellowstone Grizzly Bears.  
585 *Behavioral Ecology* **1998**, *9*, 339–344, doi:10.1093/beheco/9.4.339.
- 586 24. Vøllestad, L.A.; Hindar, K. Developmental Stability and Environmental Stress in *Salmo salar* (Atlantic Salmon).  
587 *Heredity* **1997**, *78*, 215–222.
- 588 25. Hurtado, L.; Castrezana, S.; Mateos, M.; McLaurin, D.; Tello, M.K.; Campoy, J.; Markow, T. Developmental Stability  
589 and Environmental Stress in Natural Populations of *Drosophila pachea*. *Ecotoxicology* **1997**, *6*, 233–238.
- 590 26. Badyaev, A.V. Stress-Induced Variation in Evolution: From Behavioural Plasticity to Genetic Assimilation.  
591 *Proceedings. Biological sciences / The Royal Society* **2005**, *272*, 877–886, doi:10.1098/rspb.2004.3045.
- 592 27. Vogt, G. Disentangling the Environmentally Induced and Stochastic Developmental Components of Phenotypic  
593 Variation. In *Phenotypic switching: implications in biology and medicine*; Elsevier, 2020; pp. 207–251 ISBN 978-0-12-  
594 817996-3.
- 595 28. Vogt, G. Stochastic Developmental Variation, an Epigenetic Source of Phenotypic Diversity with Far-Reaching  
596 Biological Consequences. *J Biosci* **2015**, *40*, 159–204, doi:10.1007/s12038-015-9506-8.
- 597 29. Krishna, S.; Laxman, S. Emergence of Metabolic Heterogeneity in Cell Populations: Lessons from Budding Yeast.  
598 In *Phenotypic switching: implications in biology and medicine*; Elsevier, 2020; pp. 335–360 ISBN 978-0-12-817996-3.

- 599 30. Schwartz, M.H.; Waldbauer, J.R.; Zhang, L.; Pan, T. Global tRNA Misacylation Induced by Anaerobiosis and  
600 Antibiotic Exposure Broadly Increases Stress Resistance in *Escherichia Coli*. *Nucleic Acids Res* **2016**, gkw856,  
601 doi:10.1093/nar/gkw856.
- 602 31. Rocabert, C.; Beslon, G.; Knibbe, C.; Bernard, S. *Phenotypic Noise and the Cost of Complexity*; Evolutionary Biology,  
603 2020;
- 604 32. Wang, Q.; Huang, L.; Wen, K.; Yu, J.; ,Center for Applied Mathematics, Guangzhou University, Guangzhou 510006,  
605 China; ,College of Science, Guangxi University of Science and Technology, Liuzhou 545006, China; ,School of  
606 Statistics and Mathematics, Guangdong University of Finance and Economics, Guangzhou 510275, China The Mean  
607 and Noise of Stochastic Gene Transcription with Cell Division. *Mathematical Biosciences & Engineering* **2018**, *15*, 1255–  
608 1270, doi:10.3934/mbe.2018058.
- 609 33. Prado Casanova, M. Noise and Synthetic Biology: How to Deal with Stochasticity? *Nanoethics* **2020**, *14*, 113–122,  
610 doi:10.1007/s11569-020-00366-4.
- 611 34. Kaneko, K.; Furusawa, C. Relevance of Phenotypic Noise to Adaptation and Evolution. *IET Systems Biology* **2008**, *2*,  
612 234–246, doi:10.1049/iet-syb:20070078.
- 613 35. Hallgrímsson, B.; Willmore, K.; Hall, B.K. Canalization, Developmental Stability, and Morphological Integration in  
614 Primate Limbs. *Am. J. Phys. Anthropol.* **2002**, *119*, 131–158, doi:10.1002/ajpa.10182.
- 615 36. Ortbauer, M. Abiotic Stress Adaptation: Protein Folding Stability and Dynamics. In *Abiotic Stress - Plant Responses*  
616 *and Applications in Agriculture*; Vahdati, K., Ed.; InTech, 2013 ISBN 978-953-51-1024-8.
- 617 37. Jorgen, R.; Helen, O.; Niclas, J. What Is Bet-Hedging, Really? *Proceedings of the Royal Society B* **2010**, *277*, 1153–1154,  
618 doi:10.1086/284396.
- 619 38. Levin, B.R.; Concepción-Acevedo, J.; Udekwu, K.I. Persistence: A Copacetic and Parsimonious Hypothesis for the  
620 Existence of Non-Inherited Resistance to Antibiotics. *Current Opinion in Microbiology* **2014**, *21*, 18–21,  
621 doi:10.1016/j.mib.2014.06.016.
- 622 39. Girgis, H.S.; Harris, K.; Tavazoie, S. Large Mutational Target Size for Rapid Emergence of Bacterial Persistence.  
623 *Proceedings of the National Academy of Sciences* **2012**, *109*, 12740–12745, doi:10.1073/pnas.1205124109.
- 624 40. Nichol, D.; Robertson, M.; Jeavons, P.; Anderson, A.R.A. Stochasticity in the Genotype-Phenotype Map:  
625 Implications for the Robustness and Persistence of Bet-Hedging. *Genetics* **2016**, *204*, 1523–1539.
- 626 41. Pu, Y.; Ke, Y.; Bai, F. Active Efflux in Dormant Bacterial Cells – New Insights into Antibiotic Persistence. *Drug*  
627 *Resistance Updates* **2017**, *30*, 7–14, doi:10.1016/j.drug.2016.11.002.
- 628 42. Pu, Y.; Zhao, Z.; Li, Y.; Zou, J.; Ma, Q.; Zhao, Y.; Ke, Y.; Zhu, Y.; Chen, H.; Baker, M.A.B.; et al. Enhanced Efflux  
629 Activity Facilitates Drug Tolerance in Dormant Bacterial Cells. *Molecular Cell* **2016**, *62*, 284–294,  
630 doi:10.1016/j.molcel.2016.03.035.
- 631 43. LaFleur, M.D.; Qi, Q.; Lewis, K. Patients with Long-Term Oral Carriage Harbor High-Persister Mutants of *Candida*  
632 *Albicans*. *AAC* **2010**, *54*, 39–44, doi:10.1128/AAC.00860-09.
- 633 44. Stepanyan, K.; Wenseleers, T.; Duéñez-Guzmán, E.A.; Muratori, F.; Van den Bergh, B.; Verstraeten, N.; De Meester,  
634 L.; Verstrepen, K.J.; Fauvart, M.; Michiels, J. Fitness Trade-Offs Explain Low Levels of Persister Cells in the  
635 Opportunistic Pathogen *Pseudomonas Aeruginosa*. *Mol Ecol* **2015**, *24*, 1572–1583, doi:10.1111/mec.13127.
- 636 45. Goneau, L.W.; Yeoh, N.S.; MacDonald, K.W.; Cadieux, P.A.; Burton, J.P.; Razvi, H.; Reid, G. Selective Target  
637 Inactivation Rather than Global Metabolic Dormancy Causes Antibiotic Tolerance in Uropathogens. *Antimicrob.*  
638 *Agents Chemother.* **2014**, *58*, 2089–2097, doi:10.1128/AAC.02552-13.



- 639 46. Vulin, C.; Leimer, N.; Huemer, M.; Ackermann, M.; Zinkernagel, A.S. Prolonged Bacterial Lag Time Results in Small  
640 Colony Variants That Represent a Sub-Population of Persisters. *Nat Commun* **2018**, *9*, 4074, doi:10.1038/s41467-018-  
641 06527-0.
- 642 47. Van den Bergh, B.; Michiels, J.E.; Wenseleers, T.; Windels, E.M.; Boer, P.V.; Kestemont, D.; De Meester, L.;  
643 Verstrepen, K.J.; Verstraeten, N.; Fauvart, M.; et al. Frequency of Antibiotic Application Drives Rapid Evolutionary  
644 Adaptation of *Escherichia Coli* Persistence. *Nat Microbiol* **2016**, *1*, 16020, doi:10.1038/nmicrobiol.2016.20.
- 645 48. Good, B.H.; McDonald, M.J.; Barrick, J.E.; Lenski, R.E.; Desai, M.M. The Dynamics of Molecular Evolution over  
646 60,000 Generations. *Nature* **2017**, *551*, 45–50, doi:10.1038/nature24287.
- 647 49. Lamrabet, O.; Martin, M.; Lenski, R.E.; Schneider, D. Changes in Intrinsic Antibiotic Susceptibility during a Long-  
648 Term Evolution Experiment with *Escherichia Coli*. *mBio* **2019**, *10*, e00189-19, /mbio/10/2/mBio.00189-19.atom,  
649 doi:10.1128/mBio.00189-19.
- 650 50. Hazan, R.; Que, Y.-A.; Maura, D.; Rahme, L.G. A Method for High Throughput Determination of Viable Bacteria  
651 Cell Counts in 96-Well Plates. *BMC Microbiol* **2012**, *12*, 259, doi:10.1186/1471-2180-12-259.
- 652 51. Plucain, J.; Hindre, T.; Le Gac, M.; Tenaillon, O.; Cruveiller, S.; Medigue, C.; Leiby, N.; Harcombe, W.R.; Marx, C.J.;  
653 Lenski, R.E.; et al. Epistasis and Allele Specificity in the Emergence of a Stable Polymorphism in *Escherichia Coli*.  
654 *Science* **2014**, *343*, 1366–1369, doi:10.1126/science.1248688.
- 655 52. Wisser, M.J.; Ribbeck, N.; Lenski, R.E. Long-Term Dynamics of Adaptation in Asexual Populations. *Science* **2013**, *342*,  
656 1364–1367.
- 657 53. Lenski, R.E.; Rose, M.R.; Simpson, S.C.; Tadler, S.C. Long-Term Experimental Evolution in *Escherichia Coli*. I.  
658 Adaptation and Divergence During 2,000 Generations. *The American Naturalist* **1991**, *138*, 1315–1341.
- 659 54. Consuegra, J.; Plucain, J.; Gaffé, J.; Hindré, T.; Schneider, D. Genetic Basis of Exploiting Ecological Opportunity  
660 During the Long-Term Diversification of a Bacterial Population. *J Mol Evol* **2017**, *85*, 26–36, doi:10.1007/s00239-017-  
661 9802-z.
- 662 55. Vogwill, T.; Comfort, A.C.; Furió, V.; MacLean, R.C. Persistence and Resistance as Complementary Bacterial  
663 Adaptations to Antibiotics. *J. Evol. Biol.* **2016**, *29*, 1223–1233, doi:10.1111/jeb.12864.
- 664 56. Hofsteenge, N.; van Nimwegen, E.; Silander, O.K. Quantitative Analysis of Persister Fractions Suggests Different  
665 Mechanisms of Formation among Environmental Isolates of *E. Coli*. *BMC Microbiol* **2013**, *13*, 25, doi:10.1186/1471-  
666 2180-13-25.
- 667 57. Stewart, B.; Rozen, D.E. Genetic Variation for Antibiotic Persistence in *Escherichia Coli*. *Evolution* **2012**, *66*, 933–939,  
668 doi:10.1111/j.1558-5646.2011.01467.x.
- 669 58. Roemhild, R.; Gokhale, C.S.; Dirksen, P.; Blake, C.; Rosenstiel, P.; Traulsen, A.; Andersson, D.I.; Schulenburg, H.  
670 Cellular Hysteresis as a Principle to Maximize the Efficacy of Antibiotic Therapy. *Proc Natl Acad Sci USA* **2018**, *115*,  
671 9767–9772, doi:10.1073/pnas.1810004115.
- 672 59. Roemhild, R.; Schulenburg, H. Evolutionary Ecology Meets the Antibiotic Crisis. *Evolution, Medicine, and Public*  
673 *Health* **2019**, *2019*, 37–45, doi:10.1093/emph/eoz008.
- 674 60. Mitchell, A.; Romano, G.H.; Groisman, B.; Yona, A.; Dekel, E.; Kupiec, M.; Dahan, O.; Pilpel, Y. Adaptive Prediction  
675 of Environmental Changes by Microorganisms. *Nature* **2009**, *460*, 220–224, doi:10.1038/nature08112.
- 676 61. López García de Lomana, A.; Kaur, A.; Turkarslan, S.; Beer, K.D.; Mast, F.D.; Smith, J.J.; Aitchison, J.D.; Baliga, N.S.  
677 Adaptive Prediction Emerges over Short Evolutionary Time Scales. *Genome Biology and Evolution* **2017**, *9*, 1616–1623,  
678 doi:10.1093/gbe/evx116.
- 679 62. Rozen, D.E.; Lenski, R.E. Long-Term Experimental Evolution in *Escherichia Coli*. VIII. Dynamics of a Balanced  
680 Polymorphism. **2000**, *12*.

- 681 63. Rozen, D.E.; Philippe, N.; Arjan de Visser, J.; Lenski, R.E.; Schneider, D. Death and Cannibalism in a Seasonal  
682 Environment Facilitate Bacterial Coexistence. *Ecology Letters* **2009**, *12*, 34–44, doi:10.1111/j.1461-0248.2008.01257.x.
- 683 64. Großkopf, T.; Consuegra, J.; Gaffé, J.; Willison, J.C.; Lenski, R.E.; Soyer, O.S.; Schneider, D. Metabolic Modelling in  
684 a Dynamic Evolutionary Framework Predicts Adaptive Diversification of Bacteria in a Long-Term Evolution  
685 Experiment. *BMC Evol Biol* **2016**, *16*, 163, doi:10.1186/s12862-016-0733-x.
- 686 65. Keren, I.; Kaldalu, N.; Spoering, A.; Wang, Y.; Lewis, K. Persister Cells and Tolerance to Antimicrobials. *FEMS*  
687 *Microbiology Letters* **2004**, *230*, 13–18, doi:10.1016/S0378-1097(03)00856-5.
- 688 66. Jeong, H.; Barbe, V.; Lee, C.H.; Vallenet, D.; Yu, D.S.; Choi, S.-H.; Couloux, A.; Lee, S.-W.; Yoon, S.H.; Cattolico, L.;  
689 et al. Genome Sequences of Escherichia Coli B Strains REL606 and BL21(DE3). *Journal of Molecular Biology* **2009**, *394*,  
690 644–652, doi:10.1016/j.jmb.2009.09.052.
- 691 67. Rozen, D.E.; Schneider, D.; Lenski, R.E. Long-Term Experimental Evolution in Escherichia Coli. XIII. Phylogenetic  
692 History of a Balanced Polymorphism. *J Mol Evol* **2005**, *61*, 171–180, doi:10.1007/s00239-004-0322-2.
- 693 68. Bates, D.; Mächler, M.; Bolker, B.; Walker, S. Fitting Linear Mixed-Effects Models Using Lme4. *Journal of Statistical*  
694 *Software* **2015**, *67*, 1–48, doi:10.18637/jss.v067.i01.
- 695 69. Luke, S.G. Evaluating Significance in Linear Mixed-Effects Models in R. *Behav Res* **2017**, *49*, 1494–1502,  
696 doi:10.3758/s13428-016-0809-y.
- 697 70. Li, P.; Redden, D.T. Comparing Denominator Degrees of Freedom Approximations for the Generalized Linear  
698 Mixed Model in Analyzing Binary Outcome in Small Sample Cluster-Randomized Trials. *BMC Med Res Methodol*  
699 **2015**, *15*, 38, doi:10.1186/s12874-015-0026-x.
- 700 71. Hothorn, T.; Bretz, F.; Westfall, P. Simultaneous Inference in General Parametric Models. *Biometrical Journal* **2008**,  
701 *50*, 346–363, doi:10.1002/bimj.200810425.
- 702

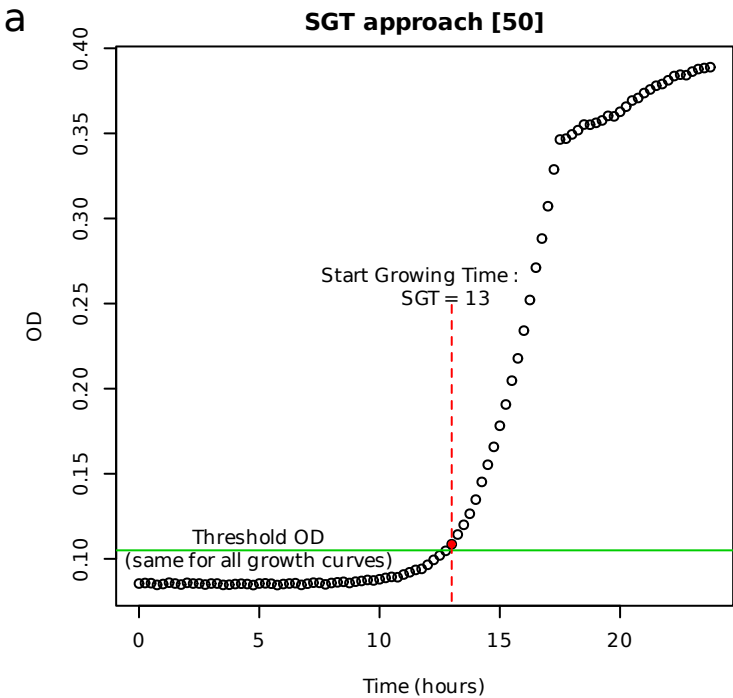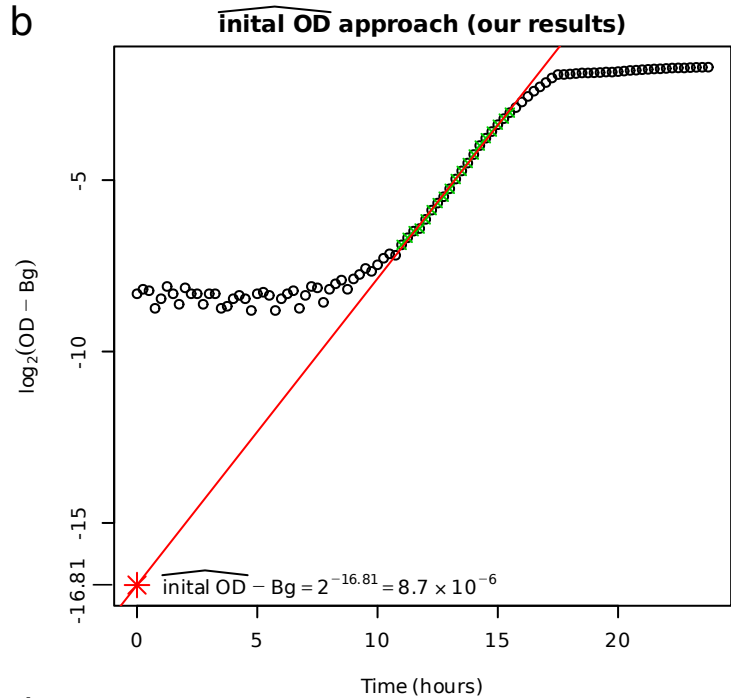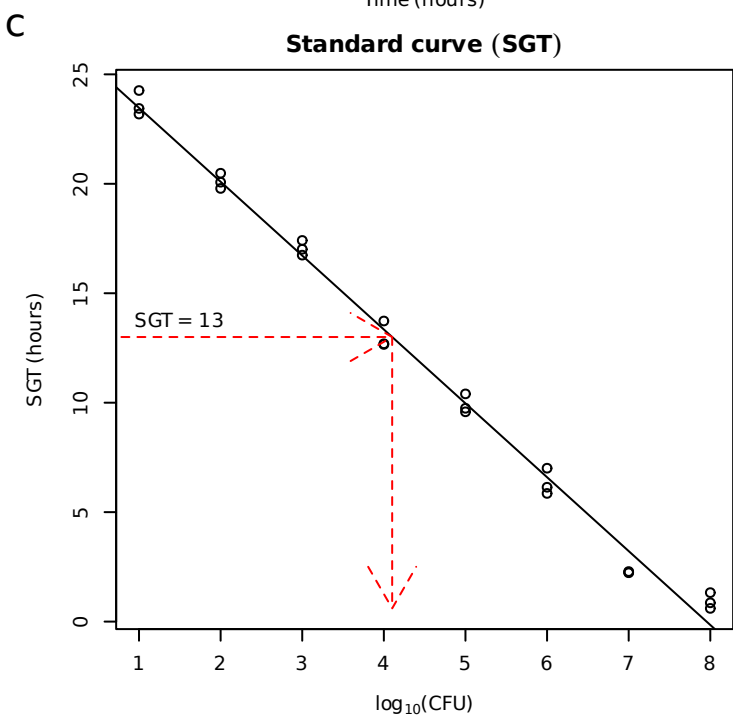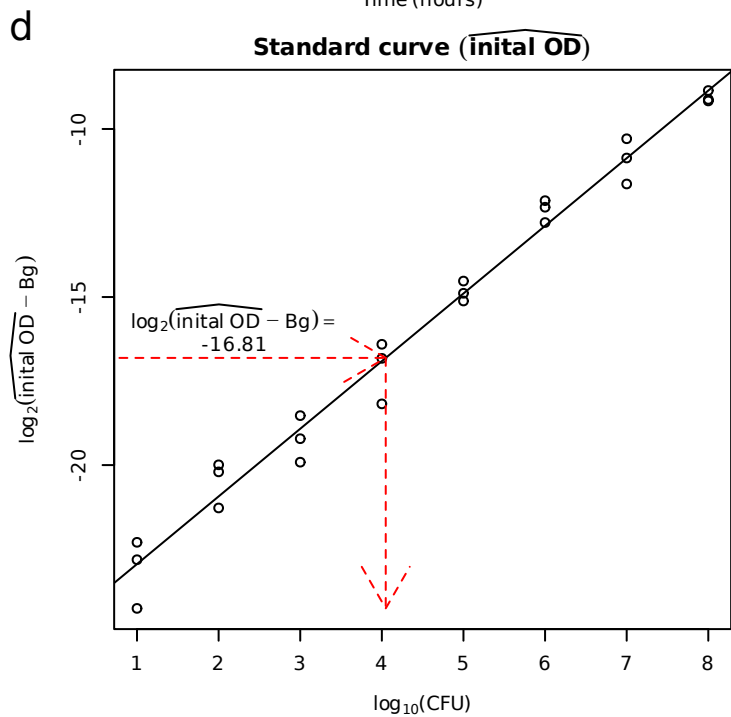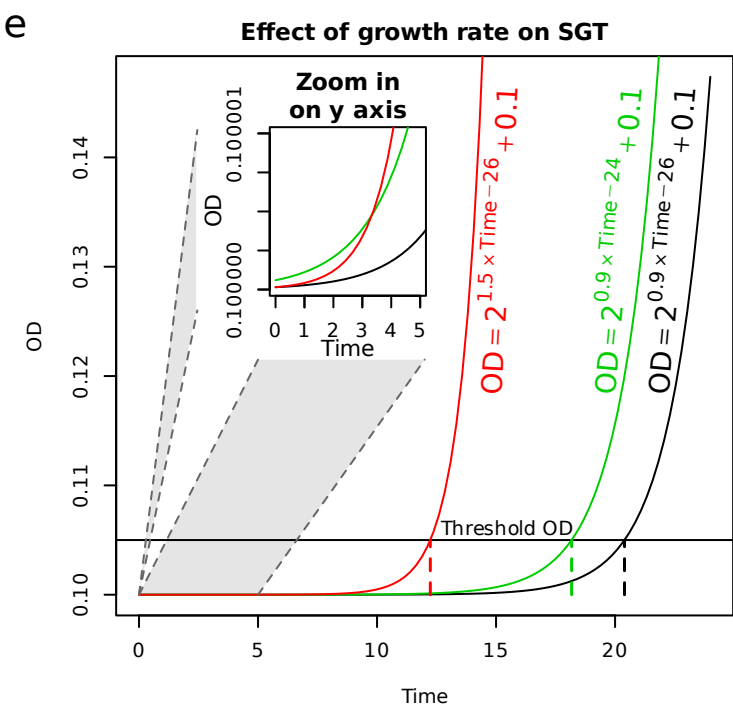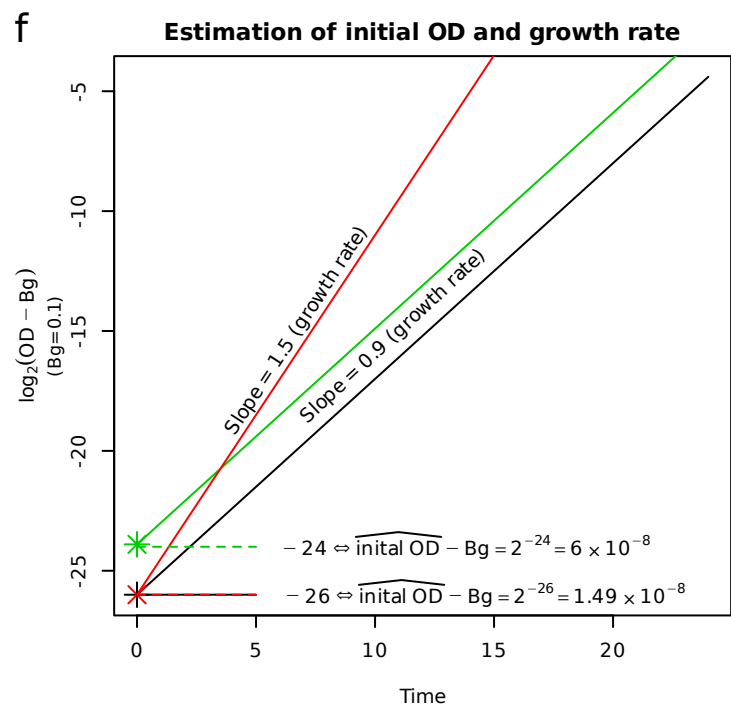

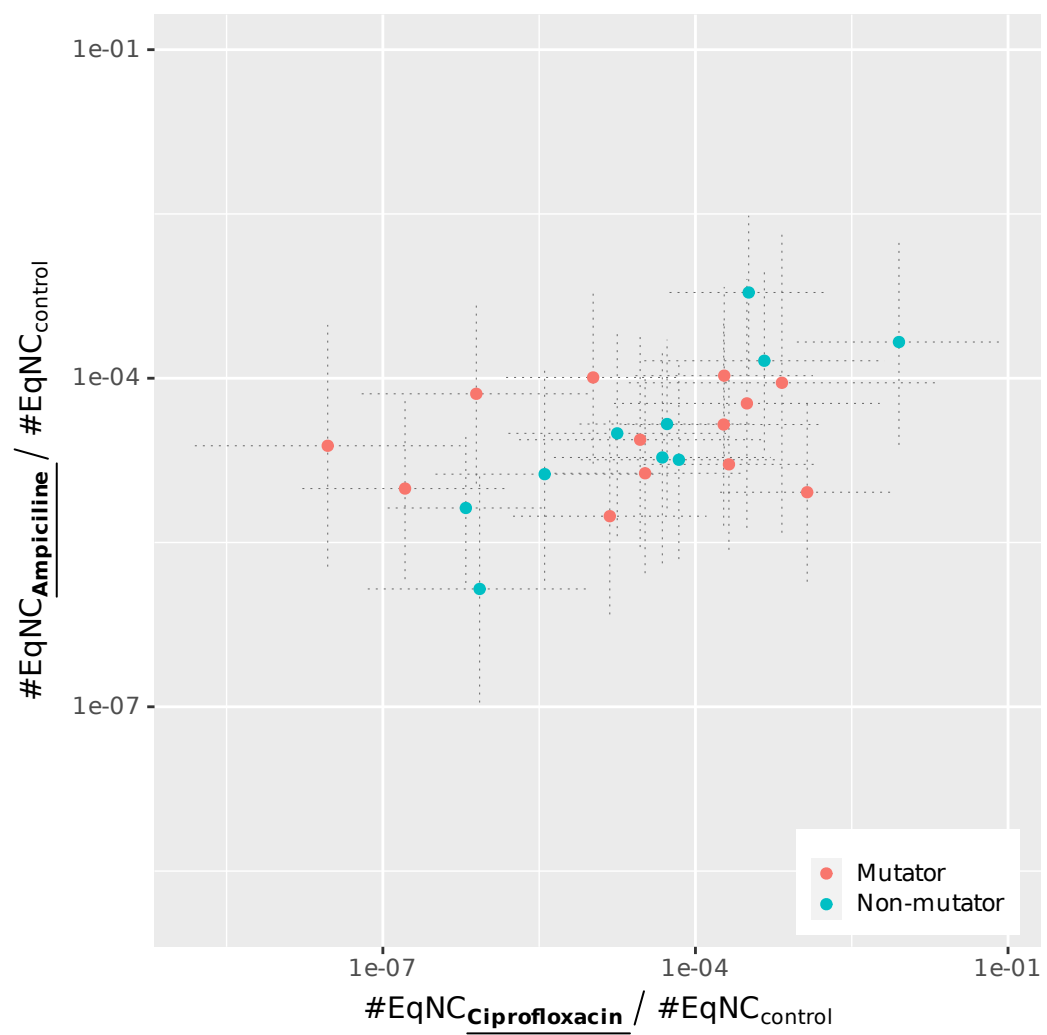

Antibiotics: × Ampicillin ▲ Ciprofloxacin

■ Ara- Ara+

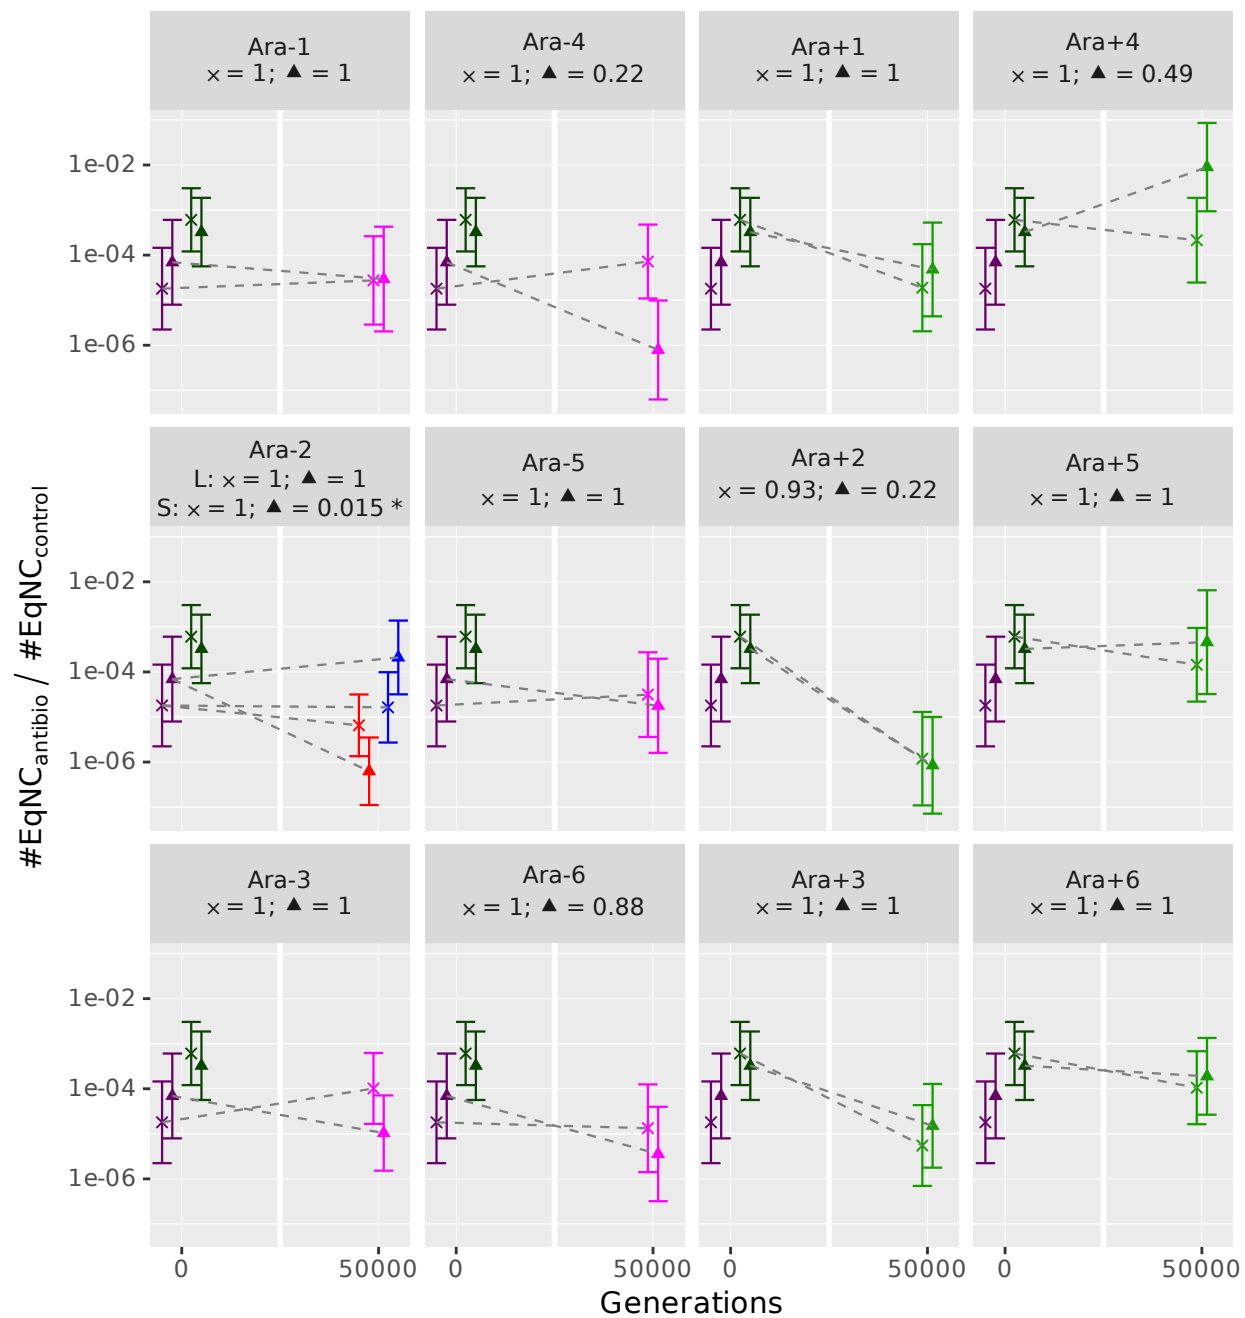

**A** Ampicillin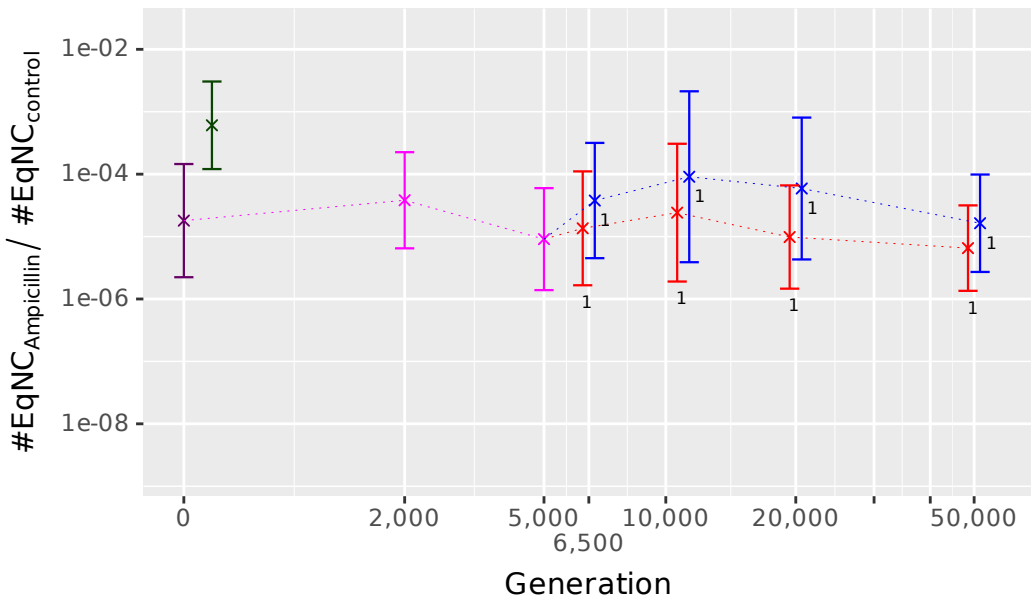**B** Ciprofloxacin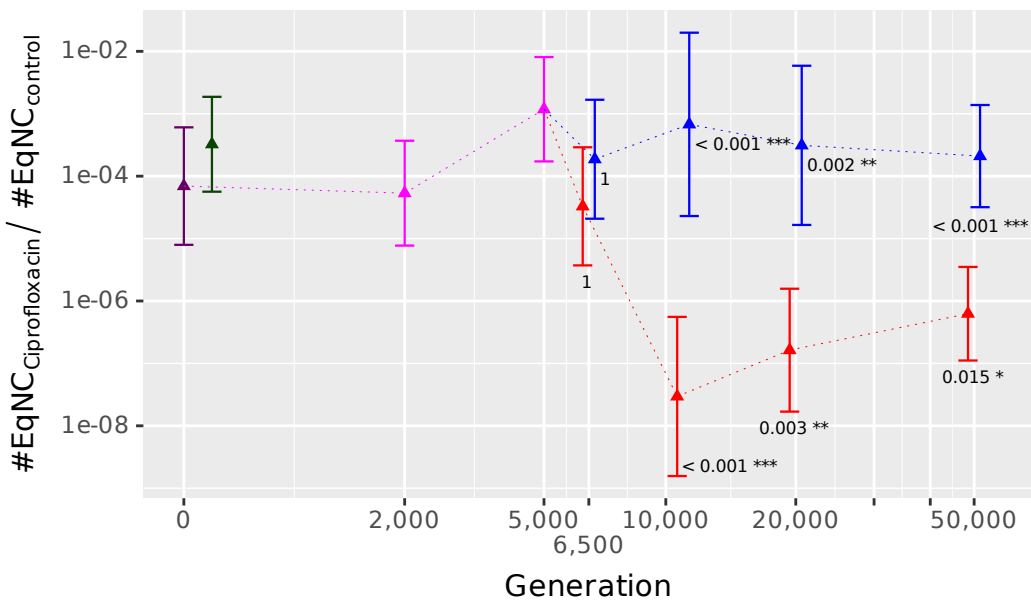

Source: https://www.biorxiv.org/content/10.1101/2022.02.24.481834v1.full.pdf
